# Supplementary material for: Physiological and Metabolic Effects of the Inoculation of Arbuscular Mycorrhizal Fungi in Solanum tuberosum Crops under Water Stress
Source: MDPI journal article supplement (doi:10.3390/plants11192539), 2022-09-27
Supplement: s1 [file s1]

Supplementary material:

Table S1: Identification of phenolic compounds by HPLC-DAD-MS/MS in leaves of *Solanum tuberosum* under water stress and inoculation of arbuscular mycorrhizal fungi.

| Compound | t <sub>R</sub> (min) | Tentative Identification       | λ max (nm) | [M - H]- | Product ions                  |
|----------|----------------------|--------------------------------|------------|----------|-------------------------------|
| HCAD1    | 5.9                  | 5-caffeoylquinic acid          | 325        | 353.09   | 191.06; 161.02; 135.04        |
| HCAD2    | 12.8                 | caffeoylquinic acid isomer     | 325        | 353.08   | 191.05; 175.11; 161.02; 133.0 |
| HCAD3    | 16.4                 | caffeoylquinic acid isomer     | 325        | 353.08   | 191.05; 171.04; 135.04        |
| HCAD4    | 19.5                 | caffeoylquinic acid isomer     | 325        | 353.08   | 191.06; 179.03; 135.04        |
| HCAD5    | 20.6                 | no identified                  | 290        | -        | -                             |
| HCAD6    | 24.5                 | no identified                  | 320        | -        | -                             |
| FLAV1    | 13.4                 | no identified                  | 350        | -        | -                             |
| FLAV2    | 14.5                 | quercetin-pentoside-rutinoside | 351        | 741.18   | 300.1                         |
| FLAV3    | 15.4                 | no identified                  | 351        | -        | -                             |
| FLAV4    | 16.1                 | quercetin-rutinoside           | 353        | 609.14   | 449.02; 301.12                |
| FLAV5    | 17.9                 | kampferol-rutinoside           | 345        | 593.15   | 429.17; 285.02                |
| FLAV6    | 21.6                 | no identified                  | 351        | 429.17   | -                             |
| FLAV7    | 24.1                 | no identified                  | 352        | 431.19   | 333.10                        |

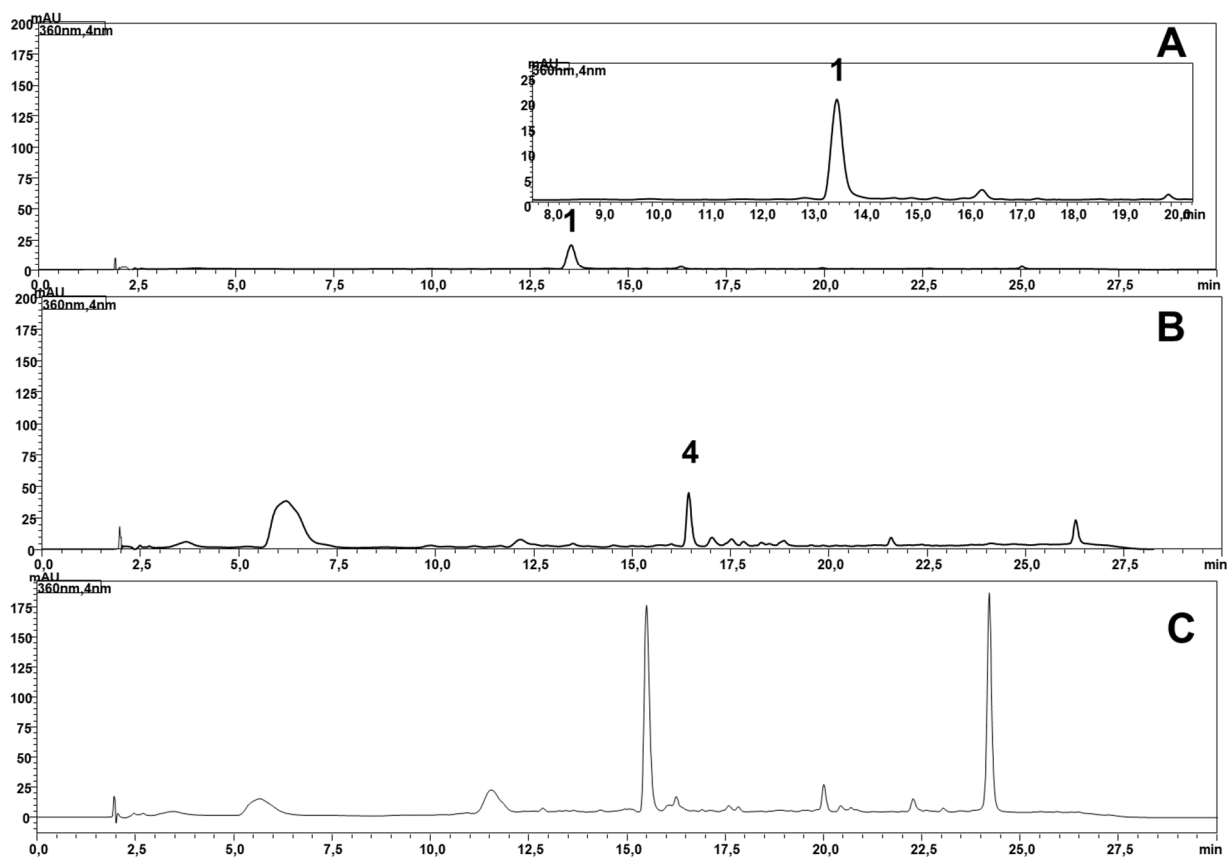

Figure S1: HPLC-DAD chromatogram (360 nm) for leaves of *Solanum tuberosum*, genotype VR808 under water stress and inoculation of arbuscular mycorrhizal fungi. Where: A: first harvest; B: second harvest; C: third harvest; 1: no identified; 4: quercetin-rutinoside (please Table S1)

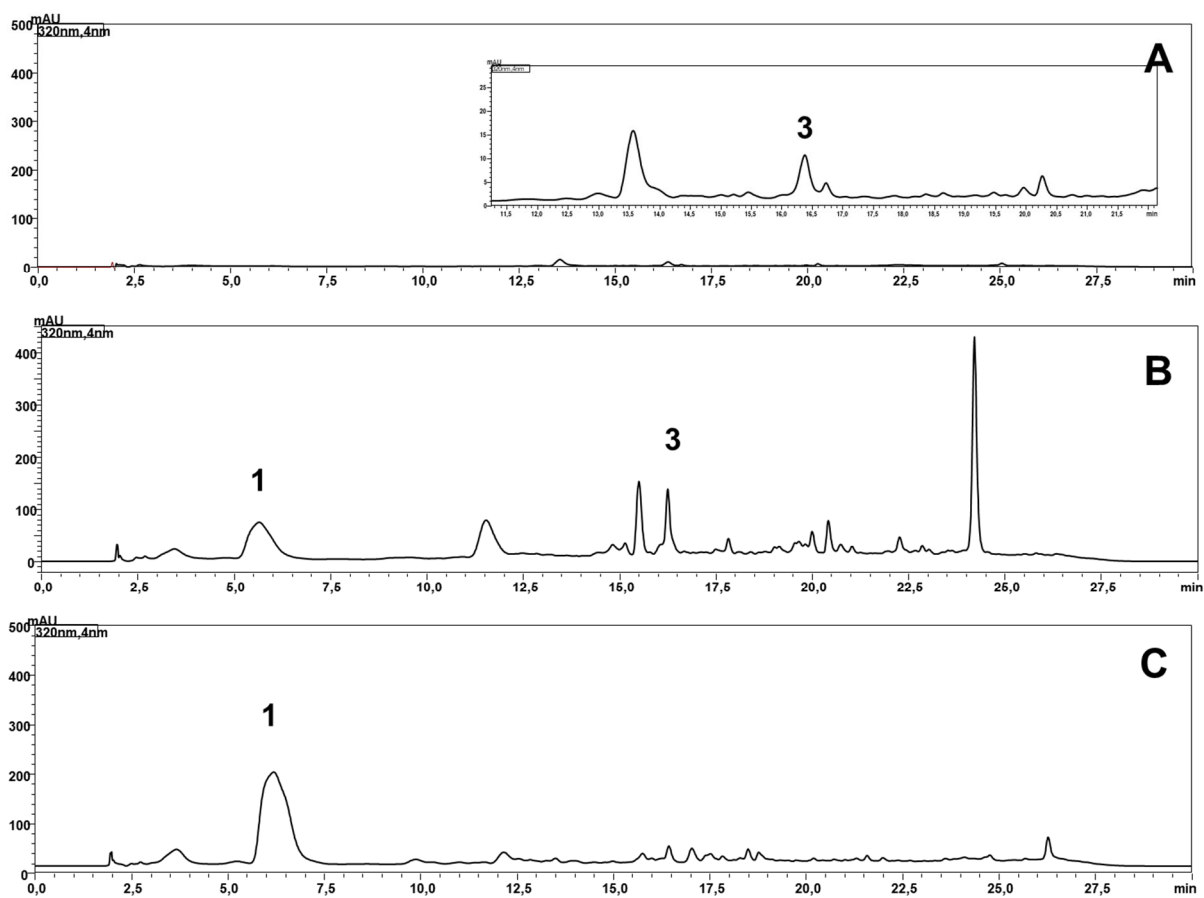

Figure S2: HPLC-DAD chromatogram (320 nm) for leaves of *Solanum tuberosum*, genotype VR808 under water stress and inoculation of arbuscular mycorrhizal fungi. Where: A: first harvest; B: second harvest; C: third harvest; 1: 5-caffeoylquinic acid 1; 3: caffeoylquinic acid isomer (please see Table S1)

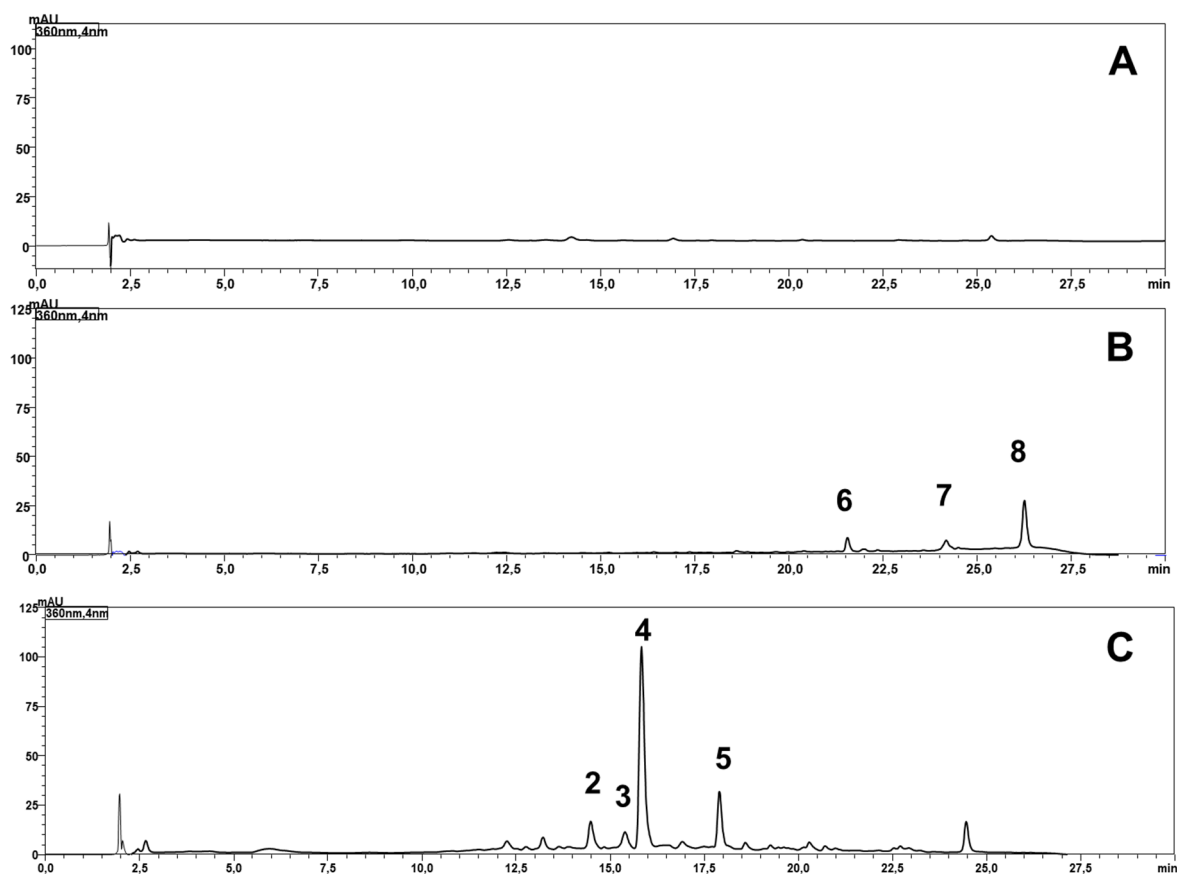

Figure S3: HPLC-DAD chromatogram (360 nm) for leaves of *Solanum tuberosum*, genotype CB2011-104 under water stress and inoculation of arbuscular mycorrhizal fungi. Where: A: first harvest; B: second harvest; C: third harvest; 2: quercetin-rutinoside-pentoside, 3: no identified, 4: quercetin-rutinoside, 5: kampferol-rutinoside, 6: no identified, 7: no identified (Please see Table S1)

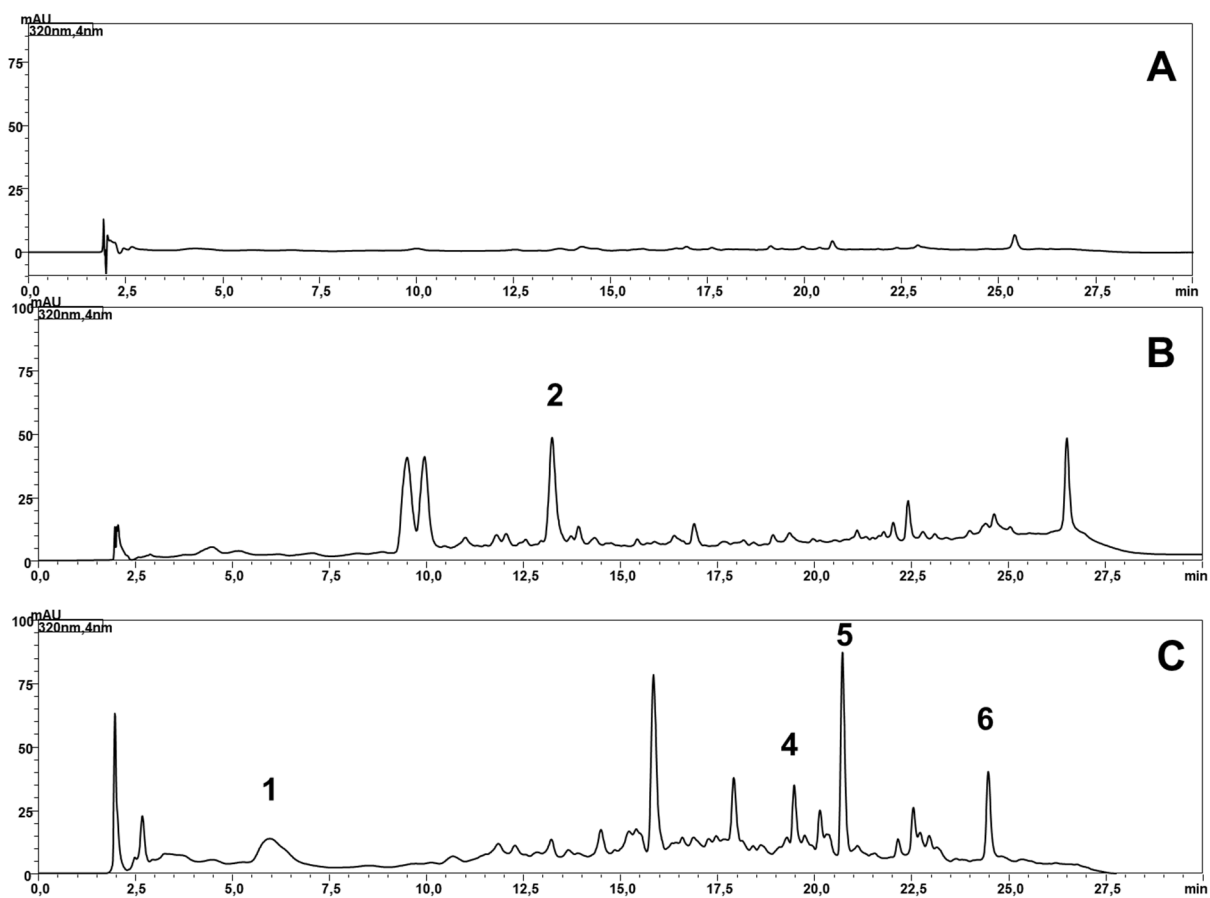

Figure S4: HPLC-DAD chromatogram (320 nm) for leaves of *Solanum tuberosum*, genotype CB2011-104 under water stress and inoculation of arbuscular mycorrhizal fungi. Where: A: first harvest; B: second harvest; C: third harvest; 1: 5-caffeoylquinic acid, 2: caffeoylquinic acid isomer, 3: caffeoylquinic acid isomer, 4: caffeoylquinic acid isomer, 5: no identified, 6: no identified (Please see Table S1)

Table S2: Individual flavonols (FLAV) and Hydroxycinnamic acid (HCAD) concentrations in leaves of *Solanum tuberosum*, genotype VR808 under water stress and inoculation of arbuscular mycorrhizal fungi, in the second harvest. Where, WM: without mycorrhiza inoculation, CC: *Claroideoglomus claroideum*, HMC26: *Claroideoglomus lamellosus* and MIX: CC + HMC26; 0: normal irrigation; S1 and S2: levels of water stress; nd: no detected. Means followed by the same lowercase letter compare the difference in stress level within the same inoculation condition (Tukey 5%). Identifications according to Table S1

| AMF   | Stress | FLAV4                  | HCAD1                 | HCAD3               |
|-------|--------|------------------------|-----------------------|---------------------|
| WM    | 0      | 6.12 ± 1.64 <i>ab</i>  | 13.59±8.60 <i>c</i>   | 2.29±0.15 <i>b</i>  |
|       | S1     | 5.56 ± 2.81 <i>abc</i> | 59.73±56.21 <i>a</i>  | 0.18±0.01 <i>de</i> |
|       | S2     | 3.43 ± 1.88 <i>cd</i>  | 3.44±1.54 <i>c</i>    | 0.96±0.02 <i>cd</i> |
| CC    | 0      | 2.42 ± 0.67 <i>d</i>   | 2.81±0.91 <i>c</i>    | 1.16±0.51 <i>c</i>  |
|       | S1     | 4.35 ± 1.84 <i>bcd</i> | 58.96±72.20 <i>ab</i> | 2.19±1.06 <i>b</i>  |
|       | S2     | 2.77 ± 1.33 <i>d</i>   | 1.79±0.47 <i>c</i>    | nd                  |
| HMC26 | 0      | 7.50 ± 0.61 <i>a</i>   | 16.51±8.36 <i>bc</i>  | nd                  |
|       | S1     | 3.29 ± 1.19 <i>cd</i>  | 4.85±1.53 <i>c</i>    | 1.60±0.49 <i>bc</i> |
|       | S2     | 2.46 ± 0.70 <i>d</i>   | 16.62±16.93 <i>bc</i> | <i>nd</i>           |
| MIX   | 0      | 5.81 ± 2.61 <i>abc</i> | 4.61±1.17 <i>c</i>    | 3.48±1.46 <i>a</i>  |
|       | S1     | 4.38 ± 1.52 <i>bcd</i> | 4.54±1.56 <i>c</i>    | nd                  |
|       | S2     | 2.65 ± 0.19 <i>d</i>   | 3.82±1.67 <i>c</i>    | 1.29±0.29 <i>c</i>  |

Table S3: Individual flavonols (FLAV) and Hydroxycinnamic acid (HCAD) concentrations in leaves of *Solanum tuberosum*, genotype CB2011-104 under water stress and inoculation of arbuscular mycorrhizal fungi, in the second harvest. Where, WM: without mycorrhiza inoculation, CC: *Claroideoglomus claroideum*, HMC26: *Claroideoglomus lamellosus* and MIX: CC + HMC26; 0: normal irrigation; S1 and S2: levels of water stress; nd: no detected. Means followed by the same lowercase letter compare the difference in stress level within the same inoculation condition (Tukey 5%). Identifications according to Table S1

| AMF   | Stress | FLAV6              | FLAV7               | HCAD1                | HCAD2                |
|-------|--------|--------------------|---------------------|----------------------|----------------------|
| WM    | 0      | nd                 | 4.55±2.64 <i>ab</i> | 5.00±1.80 <i>abc</i> | 2.89±0.93 <i>abc</i> |
|       | S1     | nd                 | 6.78±3.03 <i>a</i>  | 5.87±4.64 <i>abc</i> | 4.78±3.06 <i>ab</i>  |
|       | S2     | 1.12±0.09 <i>b</i> | 3.77±0.78 <i>bc</i> | 4.62±1.91 <i>abc</i> | 3.84±0.49 <i>abc</i> |
| CC    | 0      | nd                 | 2.57±0.99 <i>bc</i> | 10.99±11.39 <i>a</i> | 4.95±4.61 <i>a</i>   |
|       | S1     | nd                 | 1.87±0.35 <i>c</i>  | 2.16±0.50 <i>bc</i>  | 1.57±0.52 <i>bc</i>  |
|       | S2     | 1.29±0.20 <i>a</i> | 3.96±1.20 <i>bc</i> | nd                   | 2.3±0.85 <i>abc</i>  |
| HMC26 | 0      | nd                 | 2.14±0.99 <i>c</i>  | 2.71±1.10 <i>bc</i>  | 1.59±0.80 <i>bc</i>  |
|       | S1     | nd                 | 2.72±0.61 <i>bc</i> | 3.27±2.50 <i>bc</i>  | 2.56±1.93 <i>abc</i> |
|       | S2     | 1.12±0.10 <i>b</i> | 3.20±1.12 <i>bc</i> | 8.24±10.23 <i>ab</i> | 4.17±3.21 <i>abc</i> |
| MIX   | 0      | nd                 | 3.10±1.31 <i>bc</i> | 1.28±0.22 <i>bc</i>  | 1.40±0.38 <i>c</i>   |
|       | S1     | nd                 | 1.83±0.86 <i>c</i>  | 1.89±0.71 <i>bc</i>  | 1.37±0.54 <i>c</i>   |
|       | S2     | nd                 | 2.14±1.10 <i>c</i>  | 1.72±0.45 <i>bc</i>  | 2.66±1.68 <i>abc</i> |

Table S4: Individual flavonols (FLAV) and Hydroxycinnamic acid (HCAD) concentrations in leaves of *Solanum tuberosum*, genotype VR808 under water stress and inoculation of arbuscular mycorrhizal fungi, in the third harvest. Where, WM: without mycorrhiza inoculation, CC: *Claroideoglomus claroideum*, HMC26: *Claroideoglomus lamellosus* and MIX: CC + HMC26; 0: normal irrigation; S1 and S2: levels of water stress; nd: no detected. Means followed by the same lowercase letter compare the difference in stress level within the same inoculation condition (Tukey 5%). Identifications according to Table S1.

| AMF   | Stress | FLAV4                | HCAD1                 | HCAD2               | HCAD3                 | HCAD4                | HCAD6                |
|-------|--------|----------------------|-----------------------|---------------------|-----------------------|----------------------|----------------------|
| WM    | 0      | 6.46±3.10 <i>ab</i>  | 20.73±19.98 <i>b</i>  | 5.13±3.31 <i>b</i>  | 6.29±3.95 <i>cde</i>  | 5.77±0.63 <i>abc</i> | 32.70±3.17 <i>b</i>  |
|       | S1     | 3.06±1.50 <i>bcd</i> | 8.84±6.24 <i>b</i>    | nd                  | 1.60±1.19 <i>f</i>    | 2.96±0.76 <i>de</i>  | 20.46±6.25 <i>b</i>  |
|       | S2     | 3.53±1.58 <i>bcd</i> | 2.72±0.70 <i>b</i>    | nd                  | 7.52±2.94 <i>bcd</i>  | 5.02±1.71 <i>bcd</i> | 23.87±9.80 <i>b</i>  |
| CC    | 0      | 1.66±0.14 <i>d</i>   | 2.42±0.51 <i>b</i>    | nd                  | 3.80±2.10 <i>def</i>  | 4.08±3.10 <i>cde</i> | 16.51±12.39 <i>b</i> |
|       | S1     | 1.91±0.81 <i>cd</i>  | 5.03±0.77 <i>b</i>    | nd                  | 10.75±0.54 <i>ab</i>  | 8.07±0.43 <i>a</i>   | 32.41±6.52 <i>b</i>  |
|       | S2     | 3.13±1.46 <i>bcd</i> | 4.02±1.31 <i>b</i>    | nd                  | 7.48±1.00 <i>bc</i>   | 6.35±0.90 <i>ab</i>  | 34.11±2.97 <i>ab</i> |
| HMC26 | 0      | 8.61±5.51 <i>ab</i>  | 47.55±48.88 <i>ab</i> | 11.21±6.11 <i>a</i> | 4.14±3.45 <i>cdef</i> | 3.97±2.33 <i>cde</i> | 29.31±16.92 <i>b</i> |
|       | S1     | 5.79±3.21 <i>ab</i>  | 75.36±92.66 <i>a</i>  | nd                  | 12.34±4.01 <i>a</i>   | 6.94±1.48 <i>ab</i>  | 54.16±32.15 <i>a</i> |
|       | S2     | 3.66±2.73 <i>bcd</i> | 6.71±6.87 <i>b</i>    | nd                  | 5.21±3.69 <i>cdef</i> | 2.32±1.28 <i>e</i>   | 17.51±15.88 <i>b</i> |
| MIX   | 0      | 3.74±1.15 <i>bcd</i> | 3.06±1.04 <i>b</i>    | nd                  | 3.14±0.65 <i>ef</i>   | 3.89±0.60 <i>cde</i> | 14.59±3.55 <i>b</i>  |
|       | S1     | 1.75±0.34 <i>d</i>   | 2.47±0.23 <i>b</i>    | nd                  | 2.85±1.34 <i>ef</i>   | 5.73±2.30 <i>abc</i> | 19.08±9.51 <i>b</i>  |
|       | S2     | 5.65±2.16 <i>abc</i> | 14.78±15.25 <i>b</i>  | nd                  | 7.98±2.12 <i>bc</i>   | 3.93±1.01 <i>cde</i> | 29.73±10.29 <i>b</i> |



Table S5: Individual flavonols (FLAV) and Hydroxycinnamic acid (HCAD) concentrations in leaves of *Solanum tuberosum*, genotype CB2011-104 under water stress and inoculation of arbuscular mycorrhizal fungi, in the third harvest. Where, WM: without mycorrhiza inoculation, CC: *Claroideoglomus claroideum*, HMC26: *Claroideoglomus lamellosus* and MIX: CC + HMC26; 0: normal irrigation; S1 and S2: levels of water stress; nd: no detected. Means followed by the same lowercase letter compare the difference in stress level within the same inoculation condition (Tukey 5%). Identifications according to Table S1.

| AMF   | Stress | FLAV2              | FLAV3              | FLAV4                | FLAV5               | HCAD1                 | HCAD4                | HCAD5                | HCAD6                 |
|-------|--------|--------------------|--------------------|----------------------|---------------------|-----------------------|----------------------|----------------------|-----------------------|
| WM    | 0      | 1.52±0.50 <i>a</i> | 1.21±0.71 <i>a</i> | 6.26±4.47 <i>ab</i>  | 2.40±1.02 <i>a</i>  | 29.80±26.16 <i>ab</i> | 6.41±2.11 <i>bcd</i> | 1.13±0.29 <i>cd</i>  | 12.17±6.70 <i>bc</i>  |
|       | S1     | Nd                 | nd                 | nd                   | nd                  | 5.80±2.99 <i>b</i>    | 4.22±0.89 <i>d</i>   | 2.83±0.58 <i>b</i>   | 9.82±0.49 <i>bc</i>   |
|       | S2     | Nd                 | nd                 | nd                   | nd                  | 2.41±1.99 <i>b</i>    | 5.20±1.55 <i>cd</i>  | 2.71±0.53 <i>bc</i>  | 10.95±6.06 <i>bc</i>  |
| CC    | 0      | Nd                 | nd                 | 2.12±0.38 <i>bc</i>  | nd                  | 1.87±0.99 <i>b</i>    | 4.27±0.48 <i>d</i>   | 0.72±0.07 <i>d</i>   | 6.86±1.05 <i>c</i>    |
|       | S1     | Nd                 | nd                 | nd                   | nd                  | 1.27±0.11 <i>b</i>    | 6.97±1.85 <i>bcd</i> | 3.83±1.37 <i>ab</i>  | 17.73±8.21 <i>abc</i> |
|       | S2     | Nd                 | nd                 | nd                   | 1.36±0.23 <i>b</i>  | 18.90±8.37 <i>b</i>   | 9.96±7.69 <i>ab</i>  | 4.69±2.65 <i>a</i>   | 26.92±22.09 <i>a</i>  |
| HMC26 | 0      | Nd                 | nd                 | 1.88±0.71 <i>bc</i>  | nd                  | 12.48±14.54 <i>b</i>  | 3.75±1.44 <i>d</i>   | 0.70±0.11 <i>d</i>   | 6.43±2.13 <i>c</i>    |
|       | S1     | Nd                 | nd                 | nd                   | nd                  | 23.18±24.27 <i>ab</i> | 6.76±0.91 <i>bcd</i> | 3.88±0.85 <i>ab</i>  | 19.97±7.26 <i>ab</i>  |
|       | S2     | Nd                 | nd                 | 4.19±3.66 <i>abc</i> | 1.15±0.06 <i>b</i>  | 1.48±0.31 <i>b</i>    | 12.88±2.24 <i>ab</i> | 4.81±1.25 <i>a</i>   | 27.40±7.14 <i>a</i>   |
| MIX   | 0      | Nd                 | nd                 | 7.66±9.24 <i>a</i>   | 1.74±0.93 <i>ab</i> | 75.76±110.3 <i>a</i>  | 6.70±1.52 <i>bcd</i> | 1.13±0.13 <i>cd</i>  | 13.18±3.55 <i>bc</i>  |
|       | S1     | Nd                 | nd                 | nd                   | nd                  | 1.53±0.50 <i>b</i>    | 3.60±1.06 <i>d</i>   | 2.34±0.44 <i>bcd</i> | 5.28±0.24 <i>c</i>    |
|       | S2     | Nd                 | nd                 | 2.59±1.13 <i>bc</i>  | 1.32±0.34 <i>b</i>  | 3.33±1.89 <i>b</i>    | 8.71±2.86 <i>abc</i> | 5.34±1.02 <i>a</i>   | 14.70±6.92 <i>a</i>   |

Table S6: significance of  $p$ -values for the main effects and interaction for the variables measured and analyzed by means of factorial ANOVA to genotype VR808 in the first harvest.

| Variable       | Mycorrhiza | Stress | Interactions (M x S) |
|----------------|------------|--------|----------------------|
| FLAV1          | ***        | ***    | ***                  |
| HCAD3          | ***        | ***    | ***                  |
| TOTALPHENOLICS | ns         | ***    | ***                  |
| DPPH           | ns         | ***    | ns                   |
| TEAC           | ***        | ns     | ***                  |
| CUPRAC         | ***        | ***    | ***                  |
| FRAP           | ***        | ***    | ns                   |

ns, not significant  
\*\*\* $p < 0.01$

Table S7: significance of  $p$ -values for the main effects and interaction for the variables measured and analyzed by means of factorial ANOVA to genotype CB2011-104 in the first harvest.

| Variable       | Mycorrhiza | Stress | Interactions (M x S) |
|----------------|------------|--------|----------------------|
| TOTALPHENOLICS | ***        | ***    | ***                  |
| DPPH           | ***        | ***    | ***                  |
| TEAC           | ns         | ***    | ns                   |
| CUPRAC         | ***        | ***    | ***                  |
| FRAP           | ***        | ***    | ***                  |

ns, not significant  
\*\*\* $p < 0.01$

Table S8: significance of  $p$ -values for the main effects and interaction for the variables measured and analyzed by means of factorial ANOVA to genotype VR808 in the second harvest.

| Variable       | Mycorrhiza | Stress | Interactions (M x S) |
|----------------|------------|--------|----------------------|
| FLAV4          | ***        | ***    | ***                  |
| FLAVTOT        | ***        | ***    | ***                  |
| HCAD1          | ***        | ***    | ***                  |
| HCAD3          | ***        | ***    | ***                  |
| HCADTOT        | ***        | ***    | ***                  |
| TOTALPHENOLICS | ***        | ***    | ***                  |
| DPPH           | ***        | ***    | ***                  |
| TEAC           | ns         | ***    | ***                  |
| CUPRAC         | ns         | ***    | ***                  |
| FRAP           | ***        | ***    | ***                  |

ns, not significant  
\*\*\* $p < 0.01$

Table S9: significance of *p*-values for the main effects and interaction for the variables measured and analyzed by means of factorial ANOVA to genotype CB2011-104 in the second harvest.

| <b>Variable</b>     | <b>Mycorrhiza</b> | <b>Stress</b> | <b>Interactions (M x S)</b> |
|---------------------|-------------------|---------------|-----------------------------|
| FLAV6               | ***               | ***           | ***                         |
| FLAV7               | ***               | ns            | ***                         |
| FLAVTOT             | ***               | ***           | ***                         |
| HCAD1               | ***               | ns            | ***                         |
| HCAD2               | ***               | ns            | ***                         |
| HCADTOT             | ***               | ns            | ***                         |
| TOTALPHENOLICS      | ***               | ***           | ns                          |
| DPPH                | ***               | ***           | ***                         |
| TEAC                | ***               | ***           | ***                         |
| CUPRAC              | ***               | ***           | ***                         |
| FRAP                | ***               | ***           | ***                         |
| ns, not significant |                   |               |                             |
| *** <i>p</i> < 0.01 |                   |               |                             |

Table S10: significance of *p*-values for the main effects and interaction for the variables measured and analyzed by means of factorial ANOVA to genotype VR808 in the third harvest.

| <b>Variable</b>     | <b>Mycorrhiza</b> | <b>Stress</b> | <b>Interactions (M x S)</b> |
|---------------------|-------------------|---------------|-----------------------------|
| FLAV4               | ***               | ***           | ***                         |
| FLAVTOT             | ***               | ***           | ***                         |
| HCAD1               | ***               | ns            | ***                         |
| HCAD2               | ***               | ***           | ***                         |
| HCAD3               | ***               | ***           | ***                         |
| HCAD4               | ***               | ***           | ***                         |
| HCAD6               | ***               | ***           | ***                         |
| HCADTOT             | ***               | ns            | ***                         |
| TOTALPHEN           | ns                | ***           | ***                         |
| DPPH                | ns                | ***           | ***                         |
| TEAC                | ns                | ***           | ***                         |
| CUPRAC              | ***               | ***           | ***                         |
| FRAP                | ns                | ***           | ***                         |
| ns, not significant |                   |               |                             |
| *** <i>p</i> < 0.01 |                   |               |                             |

Table S11: significance of  $p$ -values for the main effects and interaction for the variables measured and analyzed by means of factorial ANOVA to genotype CB2011-104 in the third harvest.

| Variable            | Mycorrhiza | Stress | Interactions (M x S) |
|---------------------|------------|--------|----------------------|
| FLAV2               | ***        | ***    | ***                  |
| FLAV3               | ***        | ***    | ***                  |
| FLAV4               | ***        | ***    | ***                  |
| FLAV5               | ***        | ***    | ***                  |
| FLAVTOT             | ***        | ***    | ***                  |
| HCAD1               | ***        | ***    | ***                  |
| HCAD4               | ***        | ***    | ***                  |
| HCAD5               | ***        | ***    | ***                  |
| HCAD6               | ***        | ***    | ***                  |
| HCADTOT             | ns         | ns     | ***                  |
| TOTALPHEN           | ***        | ***    | ***                  |
| DPPH                | ns         | ns     | ***                  |
| TEAC                | ***        | ***    | ***                  |
| CUPRAC              | ***        | ***    | ***                  |
| FRAP                | ns         | ***    | ***                  |
| ns, not significant |            |        |                      |
| *** $p < 0.01$      |            |        |                      |

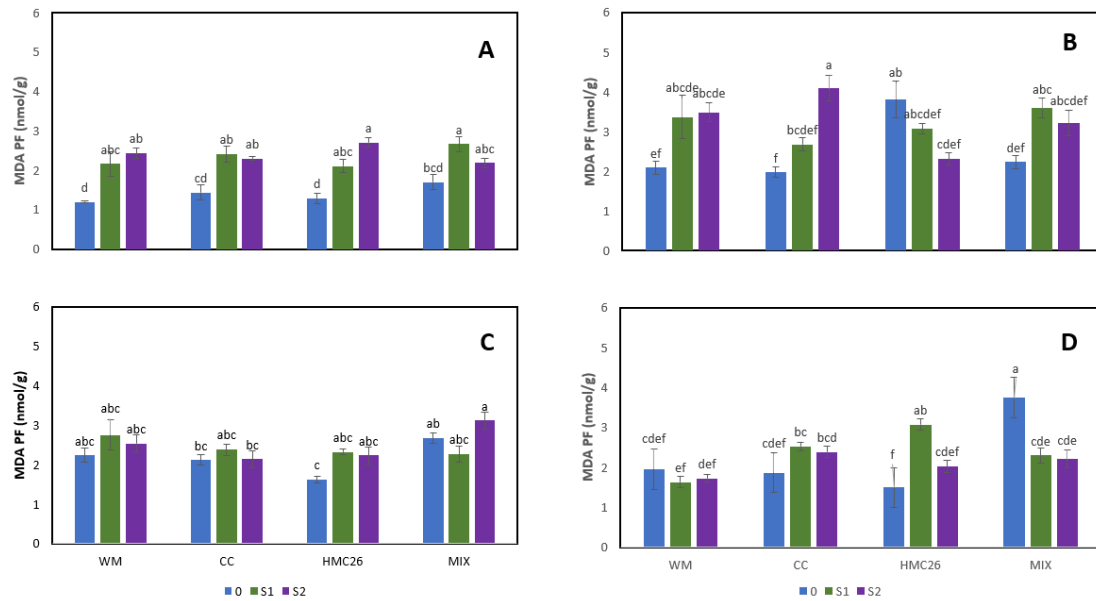

Figure S5. Lipid peroxidation in *Solanum tuberosum* leaves, under water stress and inoculation with arbuscular mycorrhizal fungi, genotype VR 808 second harvest (A), genotype VR 808 third harvest (B) genotype CB2011-104 second harvest (C), and genotype CB2011-104 third harvest (D). Means followed by the same lowercase letter compare the difference in stress level within the same inoculation condition (Tukey 5%). Where, WM: without mycorrhiza inoculation, CC: *Claroideoglomus claroideum*, HMC26: *Claroideoglomus lamellosum* and MIX: CC + HMC26; 0: normal irrigation; S1 and S2: levels of water stress.

Table S12. Tuber numbers of *Solanum tuberosum*, genotype VR808 under water stress and inoculation of arbuscular mycorrhizal fungi. Means followed by the same lowercase letter compare the difference in stress level within the same inoculation condition (Tukey 5%). Where, WM: without mycorrhiza inoculation, CC: *Claroideoglomus claroideum*, HMC26: *Claroideoglomus lamellosum* and MIX: CC + HMC26; 0: normal irrigation; S1 and S2: levels of water stress

|       | 0               | S1              | S2              |
|-------|-----------------|-----------------|-----------------|
| WM    | 7 ± 1 <i>a</i>  | 8 ± 1 <i>a</i>  | 5 ± 0 <i>bc</i> |
| CC    | 9 ± 1 <i>a</i>  | 9 ± 0 <i>a</i>  | 7 ± 0 <i>ab</i> |
| HMC26 | 7 ± 1 <i>ab</i> | 8 ± 0 <i>a</i>  | 4 ± 0 <i>c</i>  |
| MIX   | 8 ± 1 <i>a</i>  | 5 ± 0 <i>bc</i> | 5 ± 0 <i>c</i>  |

Table S13. Tuber numbers of *Solanum tuberosum*, genotype CB2011-104 under water stress and inoculation of arbuscular mycorrhizal fungi. Means followed by the same lowercase letter compare the difference in stress level within the same inoculation condition (Tukey 5%). Where, WM: without mycorrhiza inoculation, CC: *Claroideoglomus claroideum*, HMC26: *Claroideoglomus lamellosum* and MIX: CC + HMC26; 0: normal irrigation; S1 and S2: levels of water stress

|       | 0                | S1               | S2               |
|-------|------------------|------------------|------------------|
| WM    | 16 ± 3 <i>ab</i> | 7 ± 1 <i>ab</i>  | 7 ± 5 <i>b</i>   |
| CC    | 20 ± 4 <i>ab</i> | 15 ± 5 <i>ab</i> | 11 ± 1 <i>ab</i> |
| HMC26 | 14 ± 4 <i>ab</i> | 22 ± 4 <i>ab</i> | 12 ± 3 <i>ab</i> |
| MIX   | 25 ± 5 <i>a</i>  | 14 ± 4 <i>ab</i> | 12 ± 4 <i>ab</i> |
